# Supplementary material for: Mono BN-substituted analogues of naphthalene: a theoretical analysis of the effect of BN position on stability, aromaticity and frontier orbital energies
Source: Royal Society of Chemistry journal article supplement (doi:10.1039/c8nj01529e), 2018-01-01
Supplement: c8nj01529e1.pdf [file c8nj01529e1.pdf]

# **Mono BN-Substituted Analogues of Naphthalene: A Theoretical Analysis of the Effect of BN Position on Stability, Aromaticity and Frontier Orbital Energies**

Milovan Stojanović<sup>a</sup> and Marija Baranac-Stojanović\*<sup>b</sup>

<sup>a</sup> *University of Belgrade, Institute of Chemistry, Technology and Metallurgy - Center for Chemistry, Njegoševa 12, P.O.Box 473, 11000 Belgrade, Serbia*

<sup>b</sup> *University of Belgrade - Faculty of Chemistry, Studentski trg 12-16, P.O.Box 158, 11000 Belgrade, Serbia*

**Supplementary Information**

**Absolute energies (atomic units) and x, y, z coordinates (Å)  
of the optimized structures**

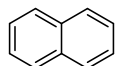

E = -385.9888708 a.u.

| Center Number | Atomic Number | Atomic Type | Coordinates (Angstroms) |           |           |
|---------------|---------------|-------------|-------------------------|-----------|-----------|
|               |               |             | X                       | Y         | Z         |
| 1             | 6             | 0           | 0.000000                | 2.430634  | 0.707529  |
| 2             | 6             | 0           | 0.000000                | 1.243886  | 1.400697  |
| 3             | 6             | 0           | 0.000000                | 0.000000  | 0.715970  |
| 4             | 6             | 0           | 0.000000                | 0.000000  | -0.715970 |
| 5             | 6             | 0           | 0.000000                | 1.243886  | -1.400697 |
| 6             | 6             | 0           | 0.000000                | 2.430634  | -0.707529 |
| 7             | 1             | 0           | 0.000000                | -1.243119 | 2.485975  |
| 8             | 1             | 0           | 0.000000                | 3.373020  | 1.243931  |
| 9             | 1             | 0           | 0.000000                | 1.243119  | 2.485975  |
| 10            | 6             | 0           | 0.000000                | -1.243886 | 1.400697  |
| 11            | 6             | 0           | 0.000000                | -1.243886 | -1.400697 |
| 12            | 1             | 0           | 0.000000                | 1.243119  | -2.485975 |
| 13            | 1             | 0           | 0.000000                | 3.373020  | -1.243931 |
| 14            | 6             | 0           | 0.000000                | -2.430634 | -0.707529 |
| 15            | 6             | 0           | 0.000000                | -2.430634 | 0.707529  |
| 16            | 1             | 0           | 0.000000                | -1.243119 | -2.485975 |
| 17            | 1             | 0           | 0.000000                | -3.373020 | -1.243931 |
| 18            | 1             | 0           | 0.000000                | -3.373020 | 1.243931  |

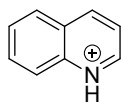

E = -402.4085276 a.u.

| Center Number | Atomic Number | Atomic Type | Coordinates (Angstroms) |           |          |
|---------------|---------------|-------------|-------------------------|-----------|----------|
|               |               |             | X                       | Y         | Z        |
| 1             | 6             | 0           | 2.391139                | 0.786789  | 0.000000 |
| 2             | 6             | 0           | 1.179382                | 1.442393  | 0.000000 |
| 3             | 6             | 0           | 0.000000                | 0.679293  | 0.000000 |
| 4             | 6             | 0           | 0.042125                | -0.746933 | 0.000000 |
| 5             | 6             | 0           | 1.311597                | -1.380460 | 0.000000 |
| 6             | 6             | 0           | 2.459501                | -0.626439 | 0.000000 |
| 7             | 1             | 0           | -1.272344               | 2.293460  | 0.000000 |
| 8             | 1             | 0           | 3.307905                | 1.364169  | 0.000000 |
| 9             | 1             | 0           | 1.132666                | 2.525766  | 0.000000 |
| 10            | 6             | 0           | -1.179324               | -1.454528 | 0.000000 |
| 11            | 1             | 0           | 1.357637                | -2.463025 | 0.000000 |
| 12            | 1             | 0           | 3.427714                | -1.111513 | 0.000000 |
| 13            | 6             | 0           | -2.391339               | -0.786896 | 0.000000 |
| 14            | 6             | 0           | -2.394102               | 0.604154  | 0.000000 |
| 15            | 1             | 0           | -1.158707               | -2.538941 | 0.000000 |

|    |   |   |           |           |          |
|----|---|---|-----------|-----------|----------|
| 16 | 1 | 0 | -3.333039 | -1.318262 | 0.000000 |
| 17 | 1 | 0 | -3.301088 | 1.194602  | 0.000000 |
| 18 | 7 | 0 | -1.239231 | 1.278501  | 0.000000 |

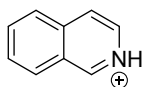

E = -402.4077095 a.u.

| Center Number | Atomic Number | Atomic Type | Coordinates (Angstroms) |           |          |
|---------------|---------------|-------------|-------------------------|-----------|----------|
|               |               |             | X                       | Y         | Z        |
| 1             | 6             | 0           | 2.408292                | 0.834933  | 0.000000 |
| 2             | 6             | 0           | 1.193174                | 1.471815  | 0.000000 |
| 3             | 6             | 0           | 0.000000                | 0.700867  | 0.000000 |
| 4             | 6             | 0           | 0.068367                | -0.735500 | 0.000000 |
| 5             | 6             | 0           | 1.337517                | -1.353148 | 0.000000 |
| 6             | 6             | 0           | 2.477731                | -0.580300 | 0.000000 |
| 7             | 1             | 0           | -1.397479               | 2.376630  | 0.000000 |
| 8             | 1             | 0           | 3.324363                | 1.412610  | 0.000000 |
| 9             | 1             | 0           | 1.131987                | 2.553874  | 0.000000 |
| 10            | 6             | 0           | -1.262263               | 1.302283  | 0.000000 |
| 11            | 6             | 0           | -1.148310               | -1.468238 | 0.000000 |
| 12            | 1             | 0           | 1.404017                | -2.434537 | 0.000000 |
| 13            | 1             | 0           | 3.449486                | -1.059915 | 0.000000 |
| 14            | 6             | 0           | -2.346766               | -0.819161 | 0.000000 |
| 15            | 1             | 0           | -1.133262               | -2.550784 | 0.000000 |
| 16            | 1             | 0           | -3.307619               | -1.313058 | 0.000000 |
| 17            | 1             | 0           | -3.268270               | 1.019624  | 0.000000 |
| 18            | 7             | 0           | -2.367098               | 0.553463  | 0.000000 |

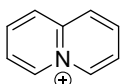

E = -402.3934158 a.u.

| Center Number | Atomic Number | Atomic Type | Coordinates (Angstroms) |           |           |
|---------------|---------------|-------------|-------------------------|-----------|-----------|
|               |               |             | X                       | Y         | Z         |
| 1             | 6             | 0           | 0.000000                | -2.390025 | 0.711528  |
| 2             | 6             | 0           | 0.000000                | -1.195409 | 1.362326  |
| 3             | 6             | 0           | 0.000000                | 0.000000  | -0.728168 |
| 4             | 6             | 0           | 0.000000                | -1.243741 | -1.399443 |
| 5             | 6             | 0           | 0.000000                | -2.422758 | -0.702010 |
| 6             | 1             | 0           | 0.000000                | 1.103597  | 2.439164  |
| 7             | 1             | 0           | 0.000000                | -3.302854 | 1.292426  |
| 8             | 1             | 0           | 0.000000                | -1.103597 | 2.439164  |
| 9             | 6             | 0           | 0.000000                | 1.195409  | 1.362326  |
| 10            | 6             | 0           | 0.000000                | 1.243741  | -1.399443 |
| 11            | 1             | 0           | 0.000000                | -1.229079 | -2.481753 |
| 12            | 1             | 0           | 0.000000                | -3.371456 | -1.223666 |
| 13            | 6             | 0           | 0.000000                | 2.422758  | -0.702010 |
| 14            | 6             | 0           | 0.000000                | 2.390025  | 0.711528  |

|    |   |   |          |          |           |
|----|---|---|----------|----------|-----------|
| 15 | 1 | 0 | 0.000000 | 1.229079 | -2.481753 |
| 16 | 1 | 0 | 0.000000 | 3.371456 | -1.223666 |
| 17 | 1 | 0 | 0.000000 | 3.302854 | 1.292426  |
| 18 | 7 | 0 | 0.000000 | 0.000000 | 0.663978  |

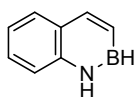

E = -389.4317673 a.u.

| Center Number | Atomic Number | Atomic Type | Coordinates (Angstroms) |           |          |
|---------------|---------------|-------------|-------------------------|-----------|----------|
|               |               |             | X                       | Y         | Z        |
| 1             | 6             | 0           | -2.420665               | 0.673359  | 0.000000 |
| 2             | 6             | 0           | -1.232460               | 1.380843  | 0.000000 |
| 3             | 6             | 0           | 0.000000                | 0.703054  | 0.000000 |
| 4             | 6             | 0           | 0.023319                | -0.716048 | 0.000000 |
| 5             | 6             | 0           | -1.207113               | -1.406357 | 0.000000 |
| 6             | 6             | 0           | -2.412653               | -0.731229 | 0.000000 |
| 7             | 1             | 0           | 1.115133                | 2.396990  | 0.000000 |
| 8             | 1             | 0           | -3.363091               | 1.209536  | 0.000000 |
| 9             | 1             | 0           | -1.240926               | 2.466744  | 0.000000 |
| 10            | 6             | 0           | 1.286921                | -1.407695 | 0.000000 |
| 11            | 1             | 0           | -1.189159               | -2.491561 | 0.000000 |
| 12            | 1             | 0           | -3.347069               | -1.279921 | 0.000000 |
| 13            | 6             | 0           | 2.481017                | -0.751763 | 0.000000 |
| 14            | 1             | 0           | 1.241861                | -2.495486 | 0.000000 |
| 15            | 1             | 0           | 3.392980                | -1.341295 | 0.000000 |
| 16            | 1             | 0           | 3.445941                | 1.477034  | 0.000000 |
| 17            | 7             | 0           | 1.201109                | 1.389351  | 0.000000 |
| 18            | 5             | 0           | 2.485273                | 0.773504  | 0.000000 |

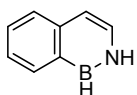

E = -389.431359 a.u.

| Center Number | Atomic Number | Atomic Type | Coordinates (Angstroms) |           |          |
|---------------|---------------|-------------|-------------------------|-----------|----------|
|               |               |             | X                       | Y         | Z        |
| 1             | 6             | 0           | -2.516256               | -0.573938 | 0.000000 |
| 2             | 6             | 0           | -1.362361               | -1.337720 | 0.000000 |
| 3             | 6             | 0           | -0.083538               | -0.740679 | 0.000000 |
| 4             | 6             | 0           | 0.000000                | 0.683256  | 0.000000 |
| 5             | 6             | 0           | -1.187057               | 1.448697  | 0.000000 |
| 6             | 6             | 0           | -2.422353               | 0.828619  | 0.000000 |
| 7             | 1             | 0           | 1.285814                | -2.737935 | 0.000000 |
| 8             | 1             | 0           | -3.490517               | -1.049878 | 0.000000 |
| 9             | 1             | 0           | -1.433211               | -2.420980 | 0.000000 |
| 10            | 6             | 0           | 1.294765                | 1.316226  | 0.000000 |
| 11            | 1             | 0           | -1.121652               | 2.532214  | 0.000000 |
| 12            | 1             | 0           | -3.326497               | 1.428159  | 0.000000 |

|    |   |   |          |           |          |
|----|---|---|----------|-----------|----------|
| 13 | 6 | 0 | 2.440107 | 0.592277  | 0.000000 |
| 14 | 1 | 0 | 1.357773 | 2.397864  | 0.000000 |
| 15 | 1 | 0 | 3.414955 | 1.065070  | 0.000000 |
| 16 | 1 | 0 | 3.321548 | -1.243038 | 0.000000 |
| 17 | 5 | 0 | 1.215055 | -1.548849 | 0.000000 |
| 18 | 7 | 0 | 2.419524 | -0.789667 | 0.000000 |

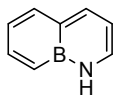

E = -389.4201872 a.u.

| Center Number | Atomic Number | Atomic Type | Coordinates (Angstroms) |           |          |
|---------------|---------------|-------------|-------------------------|-----------|----------|
|               |               |             | X                       | Y         | Z        |
| 1             | 6             | 0           | 2.455120                | -0.679075 | 0.000000 |
| 2             | 6             | 0           | 1.300465                | -1.415449 | 0.000000 |
| 3             | 6             | 0           | 0.025117                | -0.767109 | 0.000000 |
| 4             | 6             | 0           | 1.319335                | 1.515050  | 0.000000 |
| 5             | 6             | 0           | 2.462808                | 0.759139  | 0.000000 |
| 6             | 1             | 0           | -1.206087               | -2.540452 | 0.000000 |
| 7             | 1             | 0           | 3.412011                | -1.191157 | 0.000000 |
| 8             | 1             | 0           | 1.355632                | -2.502185 | 0.000000 |
| 9             | 1             | 0           | 1.423463                | 2.598383  | 0.000000 |
| 10            | 1             | 0           | 3.438168                | 1.241281  | 0.000000 |
| 11            | 1             | 0           | -1.443939               | 2.360114  | 0.000000 |
| 12            | 1             | 0           | -3.398821               | 1.151871  | 0.000000 |
| 13            | 1             | 0           | -3.351060               | -1.307572 | 0.000000 |
| 14            | 6             | 0           | -1.187680               | -1.451451 | 0.000000 |
| 15            | 6             | 0           | -2.414933               | -0.763803 | 0.000000 |
| 16            | 6             | 0           | -2.455912               | 0.616989  | 0.000000 |
| 17            | 7             | 0           | -1.322183               | 1.355765  | 0.000000 |
| 18            | 5             | 0           | 0.000000                | 0.762724  | 0.000000 |

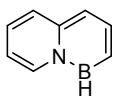

E = -389.4023942 a.u.

| Center Number | Atomic Number | Atomic Type | Coordinates (Angstroms) |           |          |
|---------------|---------------|-------------|-------------------------|-----------|----------|
|               |               |             | X                       | Y         | Z        |
| 1             | 6             | 0           | -2.436539               | 0.661833  | 0.000000 |
| 2             | 6             | 0           | -1.267467               | 1.359547  | 0.000000 |
| 3             | 6             | 0           | 0.000000                | 0.698239  | 0.000000 |
| 4             | 6             | 0           | -1.190683               | -1.389223 | 0.000000 |
| 5             | 6             | 0           | -2.393699               | -0.763270 | 0.000000 |
| 6             | 1             | 0           | 1.157783                | 2.476839  | 0.000000 |
| 7             | 1             | 0           | -3.388817               | 1.178454  | 0.000000 |
| 8             | 1             | 0           | -1.261272               | 2.442806  | 0.000000 |
| 9             | 1             | 0           | -1.091644               | -2.465587 | 0.000000 |
| 10            | 1             | 0           | -3.301481               | -1.351913 | 0.000000 |

|    |   |   |          |           |          |
|----|---|---|----------|-----------|----------|
| 11 | 1 | 0 | 1.181345 | -2.639084 | 0.000000 |
| 12 | 1 | 0 | 3.519701 | -1.098748 | 0.000000 |
| 13 | 1 | 0 | 3.338969 | 1.350349  | 0.000000 |
| 14 | 6 | 0 | 1.205395 | 1.394906  | 0.000000 |
| 15 | 6 | 0 | 2.441131 | 0.736519  | 0.000000 |
| 16 | 6 | 0 | 2.532316 | -0.648320 | 0.000000 |
| 17 | 5 | 0 | 1.279560 | -1.452564 | 0.000000 |
| 18 | 7 | 0 | 0.014985 | -0.704525 | 0.000000 |

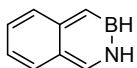

E = -389.4146579 a.u.

| Center Number | Atomic Number | Atomic Type | Coordinates (Angstroms) |           |          |
|---------------|---------------|-------------|-------------------------|-----------|----------|
|               |               |             | X                       | Y         | Z        |
| 1             | 6             | 0           | -2.430968               | 0.687448  | 0.000000 |
| 2             | 6             | 0           | -1.252919               | 1.374405  | 0.000000 |
| 3             | 6             | 0           | 0.000000                | 0.681173  | 0.000000 |
| 4             | 6             | 0           | 0.023533                | -0.770650 | 0.000000 |
| 5             | 6             | 0           | -1.249035               | -1.438476 | 0.000000 |
| 6             | 6             | 0           | -2.422295               | -0.741430 | 0.000000 |
| 7             | 1             | 0           | 1.208713                | 2.466180  | 0.000000 |
| 8             | 1             | 0           | -3.376246               | 1.217383  | 0.000000 |
| 9             | 1             | 0           | -1.247372               | 2.459957  | 0.000000 |
| 10            | 6             | 0           | 1.242122                | -1.454849 | 0.000000 |
| 11            | 1             | 0           | -1.254763               | -2.523306 | 0.000000 |
| 12            | 1             | 0           | -3.367116               | -1.274377 | 0.000000 |
| 13            | 1             | 0           | 1.195820                | -2.540677 | 0.000000 |
| 14            | 1             | 0           | 3.637465                | -1.140400 | 0.000000 |
| 15            | 1             | 0           | 3.203072                | 1.336908  | 0.000000 |
| 16            | 7             | 0           | 2.384889                | 0.742529  | 0.000000 |
| 17            | 6             | 0           | 1.198364                | 1.381443  | 0.000000 |
| 18            | 5             | 0           | 2.530679                | -0.702750 | 0.000000 |

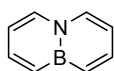

E = -389.4116986 a.u.

| Center Number | Atomic Number | Atomic Type | Coordinates (Angstroms) |           |           |
|---------------|---------------|-------------|-------------------------|-----------|-----------|
|               |               |             | X                       | Y         | Z         |
| 1             | 6             | 0           | 0.000000                | 2.494694  | -0.691241 |
| 2             | 6             | 0           | 0.000000                | 1.371581  | -1.471210 |
| 3             | 6             | 0           | 0.000000                | 1.190917  | 1.364146  |
| 4             | 6             | 0           | 0.000000                | 2.396240  | 0.734491  |
| 5             | 1             | 0           | 0.000000                | -1.491578 | -2.551231 |
| 6             | 1             | 0           | 0.000000                | 3.489358  | -1.129399 |
| 7             | 1             | 0           | 0.000000                | 1.491578  | -2.551231 |
| 8             | 1             | 0           | 0.000000                | 1.108315  | 2.445117  |
| 9             | 1             | 0           | 0.000000                | 3.292773  | 1.342323  |
| 10            | 1             | 0           | 0.000000                | -1.108315 | 2.445117  |
| 11            | 1             | 0           | 0.000000                | -3.292773 | 1.342323  |

|    |   |   |          |           |           |
|----|---|---|----------|-----------|-----------|
| 12 | 1 | 0 | 0.000000 | -3.489358 | -1.129399 |
| 13 | 6 | 0 | 0.000000 | -1.371581 | -1.471210 |
| 14 | 6 | 0 | 0.000000 | -2.494694 | -0.691241 |
| 15 | 6 | 0 | 0.000000 | -2.396240 | 0.734491  |
| 16 | 7 | 0 | 0.000000 | 0.000000  | 0.661829  |
| 17 | 6 | 0 | 0.000000 | -1.190917 | 1.364146  |
| 18 | 5 | 0 | 0.000000 | 0.000000  | -0.816130 |

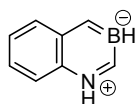

E = -389.3763263 a.u.

| Center Number | Atomic Number | Atomic Type | Coordinates (Angstroms) |           |          |
|---------------|---------------|-------------|-------------------------|-----------|----------|
|               |               |             | X                       | Y         | Z        |
| 1             | 6             | 0           | 2.411484                | -0.785498 | 0.000000 |
| 2             | 6             | 0           | 1.279693                | 1.452368  | 0.000000 |
| 3             | 1             | 0           | -1.218070               | -2.442030 | 0.000000 |
| 4             | 1             | 0           | 3.209277                | -1.522978 | 0.000000 |
| 5             | 1             | 0           | 1.106801                | -2.355261 | 0.000000 |
| 6             | 1             | 0           | 1.213910                | 2.539318  | 0.000000 |
| 7             | 1             | 0           | 3.657874                | 1.218621  | 0.000000 |
| 8             | 1             | 0           | -1.221862               | 2.528212  | 0.000000 |
| 9             | 1             | 0           | -3.349991               | 1.288444  | 0.000000 |
| 10            | 1             | 0           | -3.352565               | -1.203102 | 0.000000 |
| 11            | 6             | 0           | -1.224721               | -1.355780 | 0.000000 |
| 12            | 6             | 0           | -2.412434               | -0.664459 | 0.000000 |
| 13            | 6             | 0           | -2.407894               | 0.752114  | 0.000000 |
| 14            | 6             | 0           | -1.223222               | 1.443569  | 0.000000 |
| 15            | 6             | 0           | 0.000000                | -0.653001 | 0.000000 |
| 16            | 6             | 0           | 0.039761                | 0.775491  | 0.000000 |
| 17            | 7             | 0           | 1.184669                | -1.344959 | 0.000000 |
| 18            | 5             | 0           | 2.577190                | 0.714931  | 0.000000 |

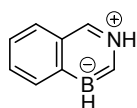

E = -389.3773564 a.u.

| Center Number | Atomic Number | Atomic Type | Coordinates (Angstroms) |           |          |
|---------------|---------------|-------------|-------------------------|-----------|----------|
|               |               |             | X                       | Y         | Z        |
| 1             | 6             | 0           | -2.481630               | 0.783534  | 0.000000 |
| 2             | 6             | 0           | -1.255047               | -1.292725 | 0.000000 |
| 3             | 1             | 0           | 1.435299                | 2.447564  | 0.000000 |
| 4             | 1             | 0           | -3.505394               | 1.139802  | 0.000000 |
| 5             | 1             | 0           | -1.240832               | 2.787299  | 0.000000 |
| 6             | 1             | 0           | -1.357647               | -2.369570 | 0.000000 |
| 7             | 1             | 0           | -3.251071               | -1.114701 | 0.000000 |
| 8             | 1             | 0           | 1.125548                | -2.513282 | 0.000000 |
| 9             | 1             | 0           | 3.326648                | -1.407090 | 0.000000 |

|    |   |   |           |           |          |
|----|---|---|-----------|-----------|----------|
| 10 | 1 | 0 | 3.481334  | 1.074923  | 0.000000 |
| 11 | 6 | 0 | 1.360583  | 1.364929  | 0.000000 |
| 12 | 6 | 0 | 2.506242  | 0.599946  | 0.000000 |
| 13 | 6 | 0 | 2.419724  | -0.812402 | 0.000000 |
| 14 | 6 | 0 | 1.193617  | -1.429675 | 0.000000 |
| 15 | 6 | 0 | 0.066507  | 0.781169  | 0.000000 |
| 16 | 6 | 0 | 0.000000  | -0.653284 | 0.000000 |
| 17 | 5 | 0 | -1.228734 | 1.594165  | 0.000000 |
| 18 | 7 | 0 | -2.390028 | -0.580675 | 0.000000 |

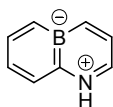

E = -389.3805876 a.u.

| Center<br>Number | Atomic<br>Number | Atomic<br>Type | Coordinates (Angstroms) |           |          |
|------------------|------------------|----------------|-------------------------|-----------|----------|
|                  |                  |                | X                       | Y         | Z        |
| 1                | 6                | 0              | -2.402728               | 0.652512  | 0.000000 |
| 2                | 6                | 0              | -1.319532               | -1.523133 | 0.000000 |
| 3                | 1                | 0              | 1.155665                | 2.524254  | 0.000000 |
| 4                | 1                | 0              | -3.284742               | 1.279026  | 0.000000 |
| 5                | 1                | 0              | -1.241798               | 2.312545  | 0.000000 |
| 6                | 1                | 0              | -1.461909               | -2.602219 | 0.000000 |
| 7                | 1                | 0              | -3.463400               | -1.178355 | 0.000000 |
| 8                | 1                | 0              | 1.619570                | -2.542280 | 0.000000 |
| 9                | 1                | 0              | 3.536907                | -1.040758 | 0.000000 |
| 10               | 1                | 0              | 3.312325                | 1.382828  | 0.000000 |
| 11               | 6                | 0              | 1.188794                | 1.435451  | 0.000000 |
| 12               | 6                | 0              | 2.404414                | 0.788047  | 0.000000 |
| 13               | 6                | 0              | 2.527438                | -0.635829 | 0.000000 |
| 14               | 6                | 0              | 1.435123                | -1.469748 | 0.000000 |
| 15               | 6                | 0              | 0.000000                | 0.671331  | 0.000000 |
| 16               | 6                | 0              | -2.470450               | -0.739469 | 0.000000 |
| 17               | 7                | 0              | -1.219569               | 1.298168  | 0.000000 |
| 18               | 5                | 0              | 0.037202                | -0.859438 | 0.000000 |

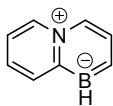

E = -389.3622686 a.u.

| Center<br>Number | Atomic<br>Number | Atomic<br>Type | Coordinates (Angstroms) |           |          |
|------------------|------------------|----------------|-------------------------|-----------|----------|
|                  |                  |                | X                       | Y         | Z        |
| 1                | 6                | 0              | 2.562154                | -0.658978 | 0.000000 |
| 2                | 6                | 0              | 1.173258                | 1.349156  | 0.000000 |
| 3                | 1                | 0              | -1.233896               | -2.495004 | 0.000000 |
| 4                | 1                | 0              | 3.578395                | -1.043295 | 0.000000 |
| 5                | 1                | 0              | 1.327695                | -2.709656 | 0.000000 |
| 6                | 1                | 0              | 1.060172                | 2.423842  | 0.000000 |
| 7                | 1                | 0              | 3.269908                | 1.392229  | 0.000000 |



|    |   |   |           |           |          |
|----|---|---|-----------|-----------|----------|
| 8  | 1 | 0 | -1.117407 | 2.406385  | 0.000000 |
| 9  | 1 | 0 | -3.308899 | 1.274188  | 0.000000 |
| 10 | 1 | 0 | -3.391267 | -1.253305 | 0.000000 |
| 11 | 6 | 0 | -1.252493 | -1.411941 | 0.000000 |
| 12 | 6 | 0 | -2.442906 | -0.731062 | 0.000000 |
| 13 | 6 | 0 | -2.400978 | 0.684294  | 0.000000 |
| 14 | 6 | 0 | -1.204724 | 1.328845  | 0.000000 |
| 15 | 6 | 0 | 0.009298  | -0.769289 | 0.000000 |
| 16 | 6 | 0 | 2.408452  | 0.729296  | 0.000000 |
| 17 | 5 | 0 | 1.340586  | -1.515509 | 0.000000 |
| 18 | 7 | 0 | 0.000000  | 0.637177  | 0.000000 |

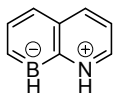

E = -389.3656123 a.u.

| Center Number | Atomic Number | Atomic Type | Coordinates (Angstroms) |           |          |
|---------------|---------------|-------------|-------------------------|-----------|----------|
|               |               |             | X                       | Y         | Z        |
| 1             | 6             | 0           | -2.413644               | -0.619434 | 0.000000 |
| 2             | 6             | 0           | -1.177882               | 1.431672  | 0.000000 |
| 3             | 1             | 0           | 1.166811                | -2.771919 | 0.000000 |
| 4             | 1             | 0           | -3.320649               | -1.208265 | 0.000000 |
| 5             | 1             | 0           | -1.270366               | -2.296274 | 0.000000 |
| 6             | 1             | 0           | -1.156090               | 2.517149  | 0.000000 |
| 7             | 1             | 0           | -3.332672               | 1.317624  | 0.000000 |
| 8             | 1             | 0           | 1.333414                | 2.452406  | 0.000000 |
| 9             | 1             | 0           | 3.414642                | 1.185561  | 0.000000 |
| 10            | 1             | 0           | 3.505933                | -1.232835 | 0.000000 |
| 11            | 6             | 0           | 2.517626                | -0.778756 | 0.000000 |
| 12            | 6             | 0           | 2.479793                | 0.628137  | 0.000000 |
| 13            | 6             | 0           | 1.301323                | 1.368367  | 0.000000 |
| 14            | 6             | 0           | 0.000000                | -0.719205 | 0.000000 |
| 15            | 6             | 0           | -2.397016               | 0.774961  | 0.000000 |
| 16            | 7             | 0           | -1.253081               | -1.282165 | 0.000000 |
| 17            | 6             | 0           | 0.046287                | 0.727873  | 0.000000 |
| 18            | 5             | 0           | 1.258323                | -1.573995 | 0.000000 |

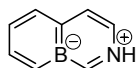

E = -389.378468 a.u.

| Center Number | Atomic Number | Atomic Type | Coordinates (Angstroms) |           |          |
|---------------|---------------|-------------|-------------------------|-----------|----------|
|               |               |             | X                       | Y         | Z        |
| 1             | 6             | 0           | -1.266791               | -1.362186 | 0.000000 |
| 2             | 1             | 0           | 1.635523                | 2.507417  | 0.000000 |
| 3             | 1             | 0           | -3.284872               | 1.217615  | 0.000000 |
| 4             | 1             | 0           | -1.450260               | 2.557586  | 0.000000 |
| 5             | 1             | 0           | -1.360710               | -2.445627 | 0.000000 |
| 6             | 1             | 0           | -3.413673               | -1.065410 | 0.000000 |

|    |   |   |           |           |          |
|----|---|---|-----------|-----------|----------|
| 7  | 1 | 0 | 1.194978  | -2.563711 | 0.000000 |
| 8  | 1 | 0 | 3.338871  | -1.412096 | 0.000000 |
| 9  | 1 | 0 | 3.558214  | 1.009097  | 0.000000 |
| 10 | 6 | 0 | 2.549345  | 0.601936  | 0.000000 |
| 11 | 6 | 0 | 2.426507  | -0.823000 | 0.000000 |
| 12 | 6 | 0 | 1.214184  | -1.475328 | 0.000000 |
| 13 | 6 | 0 | -2.426427 | -0.625094 | 0.000000 |
| 14 | 6 | 0 | 0.000000  | -0.736736 | 0.000000 |
| 15 | 6 | 0 | 1.455811  | 1.433945  | 0.000000 |
| 16 | 6 | 0 | -1.262001 | 1.487680  | 0.000000 |
| 17 | 7 | 0 | -2.390096 | 0.744868  | 0.000000 |
| 18 | 5 | 0 | 0.073767  | 0.794752  | 0.000000 |

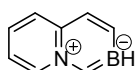

E = -389.3603588 a.u.

| Center Number | Atomic Number | Atomic Type | Coordinates (Angstroms) |           |          |
|---------------|---------------|-------------|-------------------------|-----------|----------|
|               |               |             | X                       | Y         | Z        |
| 1             | 6             | 0           | 1.199547                | 1.451504  | 0.000000 |
| 2             | 1             | 0           | -0.997722               | -2.490948 | 0.000000 |
| 3             | 1             | 0           | 3.611147                | -1.227104 | 0.000000 |
| 4             | 1             | 0           | 1.146081                | -2.436301 | 0.000000 |
| 5             | 1             | 0           | 1.067982                | 2.530469  | 0.000000 |
| 6             | 1             | 0           | 3.298530                | 1.553635  | 0.000000 |
| 7             | 1             | 0           | -1.290212               | 2.400223  | 0.000000 |
| 8             | 1             | 0           | -3.402090               | 1.086221  | 0.000000 |
| 9             | 1             | 0           | -3.228651               | -1.439302 | 0.000000 |
| 10            | 6             | 0           | -2.342942               | -0.816887 | 0.000000 |
| 11            | 6             | 0           | -2.437588               | 0.595542  | 0.000000 |
| 12            | 6             | 0           | -1.274024               | 1.316962  | 0.000000 |
| 13            | 6             | 0           | 2.447140                | 0.876805  | 0.000000 |
| 14            | 6             | 0           | 0.000000                | 0.701187  | 0.000000 |
| 15            | 6             | 0           | -1.123910               | -1.417933 | 0.000000 |
| 16            | 6             | 0           | 1.273541                | -1.358821 | 0.000000 |
| 17            | 5             | 0           | 2.575088                | -0.636123 | 0.000000 |
| 18            | 7             | 0           | 0.066988                | -0.698061 | 0.000000 |

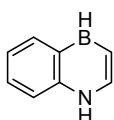

E = -389.395154 a.u.

| Center Number | Atomic Number | Atomic Type | Coordinates (Angstroms) |           |          |
|---------------|---------------|-------------|-------------------------|-----------|----------|
|               |               |             | X                       | Y         | Z        |
| 1             | 1             | 0           | -1.403371               | -2.460732 | 0.000000 |
| 2             | 1             | 0           | 3.536005                | -1.170216 | 0.000000 |
| 3             | 1             | 0           | 1.252672                | -2.781594 | 0.000000 |
| 4             | 1             | 0           | 1.242436                | 2.265514  | 0.000000 |

|    |   |   |           |           |          |
|----|---|---|-----------|-----------|----------|
| 5  | 1 | 0 | 3.290954  | 1.265863  | 0.000000 |
| 6  | 1 | 0 | -1.105063 | 2.492191  | 0.000000 |
| 7  | 1 | 0 | -3.307827 | 1.384193  | 0.000000 |
| 8  | 1 | 0 | -3.466907 | -1.097319 | 0.000000 |
| 9  | 6 | 0 | -2.494039 | -0.619322 | 0.000000 |
| 10 | 6 | 0 | -2.404487 | 0.784212  | 0.000000 |
| 11 | 6 | 0 | -1.172418 | 1.408072  | 0.000000 |
| 12 | 6 | 0 | 2.431947  | 0.601367  | 0.000000 |
| 13 | 6 | 0 | 0.000000  | 0.627163  | 0.000000 |
| 14 | 6 | 0 | -1.338495 | -1.377600 | 0.000000 |
| 15 | 6 | 0 | -0.051592 | -0.789166 | 0.000000 |
| 16 | 6 | 0 | 2.530877  | -0.761520 | 0.000000 |
| 17 | 7 | 0 | 1.234280  | 1.256859  | 0.000000 |
| 18 | 5 | 0 | 1.262078  | -1.587031 | 0.000000 |

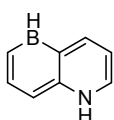

E = -389.3657927 a.u.

| Center Number | Atomic Number | Atomic Type | Coordinates (Angstroms) |           |          |
|---------------|---------------|-------------|-------------------------|-----------|----------|
|               |               |             | X                       | Y         | Z        |
| 1             | 1             | 0           | 1.479187                | -2.685592 | 0.000000 |
| 2             | 1             | 0           | -3.348314               | -1.352572 | 0.000000 |
| 3             | 1             | 0           | -1.147716               | -2.558410 | 0.000000 |
| 4             | 1             | 0           | -1.294551               | 2.260961  | 0.000000 |
| 5             | 1             | 0           | -3.323668               | 1.154367  | 0.000000 |
| 6             | 1             | 0           | 1.074745                | 2.510651  | 0.000000 |
| 7             | 1             | 0           | 3.278135                | 1.472324  | 0.000000 |
| 8             | 1             | 0           | 3.639794                | -0.917704 | 0.000000 |
| 9             | 6             | 0           | 2.609969                | -0.569365 | 0.000000 |
| 10            | 6             | 0           | 2.416890                | 0.806015  | 0.000000 |
| 11            | 6             | 0           | 1.147813                | 1.427220  | 0.000000 |
| 12            | 6             | 0           | -2.417029               | 0.563048  | 0.000000 |
| 13            | 6             | 0           | 0.000000                | 0.655269  | 0.000000 |
| 14            | 6             | 0           | 0.044311                | -0.794890 | 0.000000 |
| 15            | 6             | 0           | -2.411848               | -0.812183 | 0.000000 |
| 16            | 7             | 0           | -1.258173               | 1.250216  | 0.000000 |
| 17            | 6             | 0           | -1.167591               | -1.472876 | 0.000000 |
| 18            | 5             | 0           | 1.422900                | -1.489791 | 0.000000 |

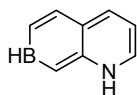

E = -389.3691034 a.u.

| Center Number | Atomic Number | Atomic Type | Coordinates (Angstroms) |           |          |
|---------------|---------------|-------------|-------------------------|-----------|----------|
|               |               |             | X                       | Y         | Z        |
| 1             | 1             | 0           | 1.457747                | -2.402664 | 0.000000 |
| 2             | 1             | 0           | -3.220615               | -1.515054 | 0.000000 |

|    |   |   |           |           |          |
|----|---|---|-----------|-----------|----------|
| 3  | 1 | 0 | -0.945806 | -2.569361 | 0.000000 |
| 4  | 1 | 0 | -1.403135 | 2.225676  | 0.000000 |
| 5  | 1 | 0 | -3.363864 | 0.990889  | 0.000000 |
| 6  | 1 | 0 | 0.893139  | 2.644762  | 0.000000 |
| 7  | 1 | 0 | 3.459409  | 1.662810  | 0.000000 |
| 8  | 1 | 0 | 3.504857  | -1.091917 | 0.000000 |
| 9  | 6 | 0 | 2.556583  | -0.557987 | 0.000000 |
| 10 | 6 | 0 | 1.091250  | 1.572916  | 0.000000 |
| 11 | 6 | 0 | -2.421452 | 0.459198  | 0.000000 |
| 12 | 6 | 0 | 0.000000  | 0.730094  | 0.000000 |
| 13 | 6 | 0 | 0.113350  | -0.723032 | 0.000000 |
| 14 | 6 | 0 | -2.325187 | -0.909876 | 0.000000 |
| 15 | 7 | 0 | -1.305111 | 1.219317  | 0.000000 |
| 16 | 6 | 0 | -1.040956 | -1.488075 | 0.000000 |
| 17 | 6 | 0 | 1.421937  | -1.314711 | 0.000000 |
| 18 | 5 | 0 | 2.476178  | 0.981695  | 0.000000 |

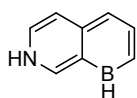

E = -389.3676053 a.u.

| Center Number | Atomic Number | Atomic Type | Coordinates (Angstroms) |           |          |
|---------------|---------------|-------------|-------------------------|-----------|----------|
|               |               |             | X                       | Y         | Z        |
| 1             | 1             | 0           | -1.396919               | 2.403580  | 0.000000 |
| 2             | 1             | 0           | 3.307920                | 1.486052  | 0.000000 |
| 3             | 1             | 0           | 1.117889                | 2.540597  | 0.000000 |
| 4             | 1             | 0           | 1.476241                | -2.657469 | 0.000000 |
| 5             | 1             | 0           | 3.652651                | -0.904652 | 0.000000 |
| 6             | 1             | 0           | -1.151647               | -2.517447 | 0.000000 |
| 7             | 1             | 0           | -3.169798               | -1.365041 | 0.000000 |
| 8             | 1             | 0           | -3.429315               | 0.971826  | 0.000000 |
| 9             | 6             | 0           | -2.426892               | 0.567902  | 0.000000 |
| 10            | 6             | 0           | -1.122058               | -1.433946 | 0.000000 |
| 11            | 6             | 0           | 2.625504                | -0.547781 | 0.000000 |
| 12            | 6             | 0           | 0.067478                | -0.741727 | 0.000000 |
| 13            | 6             | 0           | 0.000000                | 0.718881  | 0.000000 |
| 14            | 6             | 0           | 2.440365                | 0.827564  | 0.000000 |
| 15            | 6             | 0           | 1.173108                | 1.456728  | 0.000000 |
| 16            | 6             | 0           | -1.301740               | 1.323854  | 0.000000 |
| 17            | 5             | 0           | 1.428438                | -1.460314 | 0.000000 |
| 18            | 7             | 0           | -2.326258               | -0.812104 | 0.000000 |

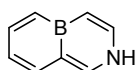

E = -389.3845742 a.u.

| Center Number | Atomic Number | Atomic Type | Coordinates (Angstroms) |           |          |
|---------------|---------------|-------------|-------------------------|-----------|----------|
|               |               |             | X                       | Y         | Z        |
| 1             | 1             | 0           | -1.426296               | -2.613892 | 0.000000 |

|    |   |   |           |           |          |
|----|---|---|-----------|-----------|----------|
| 2  | 1 | 0 | 3.555317  | -1.002218 | 0.000000 |
| 3  | 1 | 0 | 1.656856  | -2.512736 | 0.000000 |
| 4  | 1 | 0 | 1.180608  | 2.560500  | 0.000000 |
| 5  | 1 | 0 | 3.335500  | 1.422832  | 0.000000 |
| 6  | 1 | 0 | -1.379544 | 2.398602  | 0.000000 |
| 7  | 1 | 0 | -3.259499 | 1.092386  | 0.000000 |
| 8  | 1 | 0 | -3.435084 | -1.189942 | 0.000000 |
| 9  | 6 | 0 | -2.428493 | -0.786350 | 0.000000 |
| 10 | 6 | 0 | -1.235922 | 1.321259  | 0.000000 |
| 11 | 6 | 0 | 2.423271  | 0.834613  | 0.000000 |
| 12 | 6 | 0 | 0.000000  | 0.710220  | 0.000000 |
| 13 | 6 | 0 | 2.543613  | -0.600699 | 0.000000 |
| 14 | 6 | 0 | 1.463344  | -1.441775 | 0.000000 |
| 15 | 6 | 0 | -1.291389 | -1.535694 | 0.000000 |
| 16 | 7 | 0 | -2.382680 | 0.593818  | 0.000000 |
| 17 | 6 | 0 | 1.215726  | 1.472561  | 0.000000 |
| 18 | 5 | 0 | 0.062000  | -0.831412 | 0.000000 |

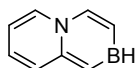

E = -389.36597 a.u.

| Center Number | Atomic Number | Atomic Type | Coordinates (Angstroms) |           |          |
|---------------|---------------|-------------|-------------------------|-----------|----------|
|               |               |             | X                       | Y         | Z        |
| 1             | 1             | 0           | 0.935325                | 2.491899  | 0.000000 |
| 2             | 1             | 0           | -3.336977               | 1.129587  | 0.000000 |
| 3             | 1             | 0           | -1.193298               | 2.355874  | 0.000000 |
| 4             | 1             | 0           | -1.100604               | -2.553305 | 0.000000 |
| 5             | 1             | 0           | -3.288999               | -1.406107 | 0.000000 |
| 6             | 1             | 0           | 1.280860                | -2.472721 | 0.000000 |
| 7             | 1             | 0           | 3.686929                | -1.109615 | 0.000000 |
| 8             | 1             | 0           | 3.208029                | 1.638292  | 0.000000 |
| 9             | 6             | 0           | 2.401810                | 0.909941  | 0.000000 |
| 10            | 6             | 0           | 1.325053                | -1.386852 | 0.000000 |
| 11            | 6             | 0           | -2.365569               | -0.839782 | 0.000000 |
| 12            | 6             | 0           | 0.087854                | -0.764079 | 0.000000 |
| 13            | 6             | 0           | -2.401046               | 0.587473  | 0.000000 |
| 14            | 6             | 0           | -1.235991               | 1.275420  | 0.000000 |
| 15            | 6             | 0           | 1.147799                | 1.428208  | 0.000000 |
| 16            | 6             | 0           | -1.163412               | -1.472200 | 0.000000 |
| 17            | 5             | 0           | 2.605950                | -0.603308 | 0.000000 |
| 18            | 7             | 0           | 0.000000                | 0.644837  | 0.000000 |

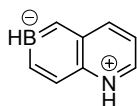

E = -389.3562329 a.u.

| Center Number | Atomic Number | Atomic Type | Coordinates (Angstroms) |   |   |
|---------------|---------------|-------------|-------------------------|---|---|
|               |               |             | X                       | Y | Z |

|    |   |   |           |           |          |
|----|---|---|-----------|-----------|----------|
| 1  | 1 | 0 | 0.941828  | 2.587054  | 0.000000 |
| 2  | 1 | 0 | -3.325739 | 1.049943  | 0.000000 |
| 3  | 1 | 0 | -1.318525 | 2.203147  | 0.000000 |
| 4  | 1 | 0 | -1.036626 | -2.602529 | 0.000000 |
| 5  | 1 | 0 | -3.248427 | -1.478433 | 0.000000 |
| 6  | 1 | 0 | 1.413357  | -2.466847 | 0.000000 |
| 7  | 1 | 0 | 3.740308  | -0.986529 | 0.000000 |
| 8  | 1 | 0 | 3.210453  | 1.707426  | 0.000000 |
| 9  | 6 | 0 | 2.394030  | 0.987176  | 0.000000 |
| 10 | 6 | 0 | 1.399199  | -1.378283 | 0.000000 |
| 11 | 6 | 0 | -2.332416 | -0.902759 | 0.000000 |
| 12 | 6 | 0 | 0.126798  | -0.791597 | 0.000000 |
| 13 | 6 | 0 | -2.403436 | 0.487397  | 0.000000 |
| 14 | 6 | 0 | 1.121487  | 1.511475  | 0.000000 |
| 15 | 6 | 0 | -1.093622 | -1.518996 | 0.000000 |
| 16 | 5 | 0 | 2.633318  | -0.532097 | 0.000000 |
| 17 | 6 | 0 | 0.000000  | 0.656504  | 0.000000 |
| 18 | 7 | 0 | -1.259351 | 1.191679  | 0.000000 |

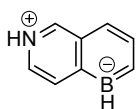

E = -389.355044 a.u.

| Center Number | Atomic Number | Atomic Type | Coordinates (Angstroms) |           |          |
|---------------|---------------|-------------|-------------------------|-----------|----------|
|               |               |             | X                       | Y         | Z        |
| 1             | 1             | 0           | -1.135274               | -2.573863 | 0.000000 |
| 2             | 1             | 0           | 3.648025                | -0.862519 | 0.000000 |
| 3             | 1             | 0           | 1.536427                | -2.657496 | 0.000000 |
| 4             | 1             | 0           | 1.071263                | 2.546267  | 0.000000 |
| 5             | 1             | 0           | 3.287978                | 1.531154  | 0.000000 |
| 6             | 1             | 0           | -1.402318               | 2.338896  | 0.000000 |
| 7             | 1             | 0           | -3.272363               | 0.995503  | 0.000000 |
| 8             | 1             | 0           | -3.327293               | -1.344395 | 0.000000 |
| 9             | 6             | 0           | -2.365028               | -0.854597 | 0.000000 |
| 10            | 6             | 0           | -1.263606               | 1.264228  | 0.000000 |
| 11            | 6             | 0           | 2.423649                | 0.869332  | 0.000000 |
| 12            | 6             | 0           | 0.000000                | 0.669613  | 0.000000 |
| 13            | 6             | 0           | 2.614355                | -0.522121 | 0.000000 |
| 14            | 6             | 0           | -1.150216               | -1.489756 | 0.000000 |
| 15            | 6             | 0           | 1.166870                | 1.465328  | 0.000000 |
| 16            | 6             | 0           | 0.076563                | -0.788695 | 0.000000 |
| 17            | 7             | 0           | -2.379489               | 0.522585  | 0.000000 |
| 18            | 5             | 0           | 1.446892                | -1.462327 | 0.000000 |

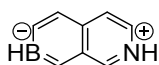

E = -389.35401 a.u.

| Center Number | Atomic Number | Atomic Type | Coordinates (Angstroms) |   |   |
|---------------|---------------|-------------|-------------------------|---|---|
|               |               |             | X                       | Y | Z |

|    |   |   |           |           |          |
|----|---|---|-----------|-----------|----------|
| 1  | 1 | 0 | -1.414837 | 2.354832  | 0.000000 |
| 2  | 1 | 0 | 3.254945  | 1.691166  | 0.000000 |
| 3  | 1 | 0 | 1.012576  | 2.611789  | 0.000000 |
| 4  | 1 | 0 | 1.392094  | -2.448725 | 0.000000 |
| 5  | 1 | 0 | 3.745871  | -1.009009 | 0.000000 |
| 6  | 1 | 0 | -1.057847 | -2.549962 | 0.000000 |
| 7  | 1 | 0 | -3.081915 | -1.454374 | 0.000000 |
| 8  | 1 | 0 | -3.433881 | 0.860002  | 0.000000 |
| 9  | 6 | 0 | -2.419553 | 0.491681  | 0.000000 |
| 10 | 6 | 0 | -1.055576 | -1.467157 | 0.000000 |
| 11 | 6 | 0 | 0.141786  | -0.733569 | 0.000000 |
| 12 | 6 | 0 | 2.425673  | 0.984787  | 0.000000 |
| 13 | 6 | 0 | -1.295784 | 1.277455  | 0.000000 |
| 14 | 6 | 0 | 1.399519  | -1.359375 | 0.000000 |
| 15 | 6 | 0 | 0.000000  | 0.724060  | 0.000000 |
| 16 | 7 | 0 | -2.256696 | -0.871033 | 0.000000 |
| 17 | 6 | 0 | 1.161038  | 1.533147  | 0.000000 |
| 18 | 5 | 0 | 2.647449  | -0.532933 | 0.000000 |

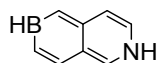

E = -389.3640394 a.u.

| Center Number | Atomic Number | Atomic Type | Coordinates (Angstroms) |           |          |
|---------------|---------------|-------------|-------------------------|-----------|----------|
|               |               |             | X                       | Y         | Z        |
| 1             | 1             | 0           | -1.031469               | -2.612494 | 0.000000 |
| 2             | 1             | 0           | 3.751807                | -0.960026 | 0.000000 |
| 3             | 1             | 0           | 1.436335                | -2.444306 | 0.000000 |
| 4             | 1             | 0           | 0.969007                | 2.610903  | 0.000000 |
| 5             | 1             | 0           | 3.239091                | 1.745651  | 0.000000 |
| 6             | 1             | 0           | -1.427917               | 2.294099  | 0.000000 |
| 7             | 1             | 0           | -3.284049               | 0.888781  | 0.000000 |
| 8             | 1             | 0           | -3.232974               | -1.463102 | 0.000000 |
| 9             | 6             | 0           | -2.292998               | -0.929201 | 0.000000 |
| 10            | 6             | 0           | -1.263159               | 1.223338  | 0.000000 |
| 11            | 6             | 0           | 0.000000                | 0.681124  | 0.000000 |
| 12            | 6             | 0           | -1.078763               | -1.530012 | 0.000000 |
| 13            | 6             | 0           | 1.154431                | 1.537294  | 0.000000 |
| 14            | 6             | 0           | 0.150067                | -0.777373 | 0.000000 |
| 15            | 7             | 0           | -2.377291               | 0.448679  | 0.000000 |
| 16            | 6             | 0           | 1.406807                | -1.355630 | 0.000000 |
| 17            | 6             | 0           | 2.419669                | 1.029010  | 0.000000 |
| 18            | 5             | 0           | 2.648977                | -0.494313 | 0.000000 |
